# Supplementary material for: Facile Preparation of β-Cyclodextrin-Modified Polysulfone Membrane for Low-Density Lipoprotein Adsorption via Dopamine Self-Assembly and Schiff Base Reaction
Source: MDPI journal article supplement (doi:10.3390/ma17050988), 2024-02-21
Supplement: s1 [file s1]

Supplementary Materials

# Facile Preparation of $\beta$ -Cyclodextrin-Modified Polysulfone Membrane for Low-Density Lipoprotein Adsorption via Dopamine Self-Assembly and Schiff Base Reaction

Fei Fang <sup>1,2</sup>, Haiyang Zhao <sup>2</sup>, Rui Wang <sup>2</sup>, Qi Chen <sup>2</sup>, Qiongyan Wang <sup>2,\*</sup> and Qinghua Zhang <sup>1,\*</sup>

<sup>1</sup> College of Chemical and Biological Engineering, Zhejiang University, Hangzhou 310027, China; 3090102659@zju.edu.cn

<sup>2</sup> Research and Development Center, Zhejiang Sucon Silicone Co., Ltd., Shaoxing 312088, China; hycsea@163.com (H.Z.); 13989503732@163.com (R.W.); 13989552135@163.com (Q.C.)

\* Correspondence: wqy2040@163.com (Q.W.); qhzhzhang@zju.edu.cn (Q.Z.)

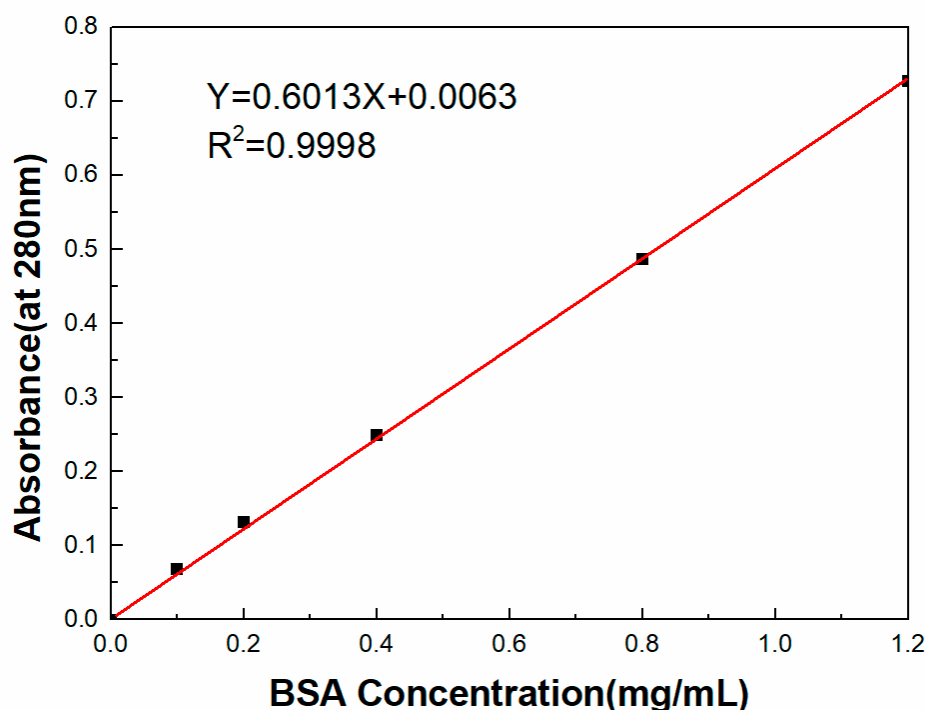

Figure S1. Standard curves of the BSA adsorption.

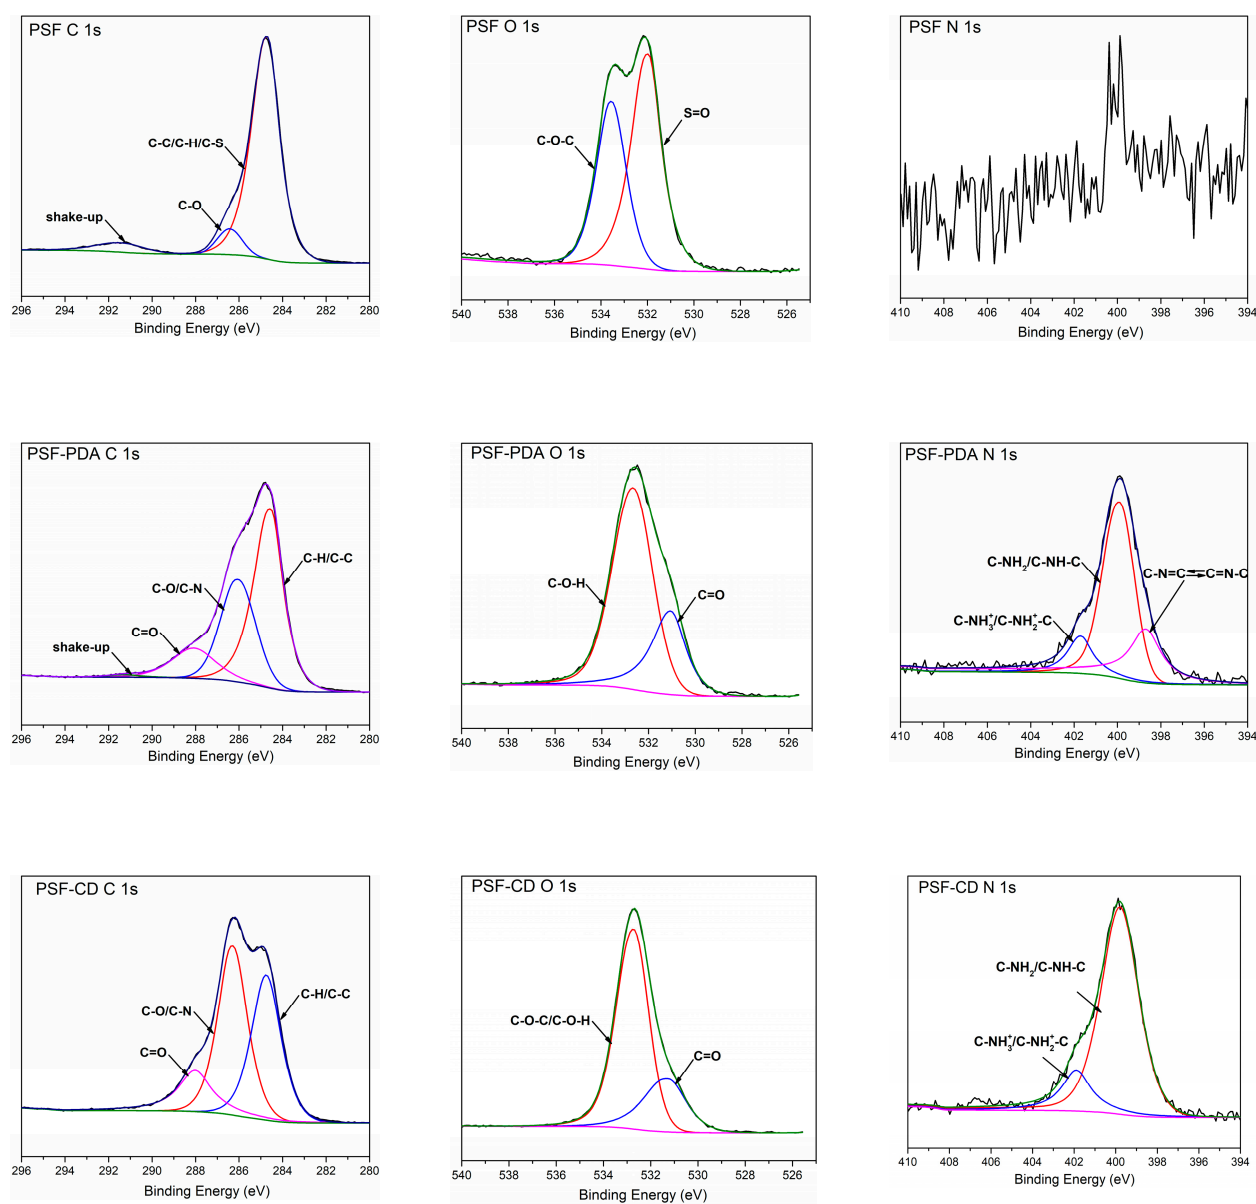

**Figure S2.** High-resolution XPS core-level spectra of C 1s, O 1s, N 1s for original, dopamine-modified and cyclodextrin-modified PSF membranes.
